# Supplementary material for: Understanding the Mechanisms Behind the Response to Environmental Perturbation in Microbial Mats: A Metagenomic-Network Based Approach
Source: Front Microbiol. 2018 Nov 28;9:2606. doi: 10.3389/fmicb.2018.02606 (PMC6280815; doi:10.3389/fmicb.2018.02606)
Supplement: Supplementary file 5 [file Table_5.xlsx]

## Sheet: Hoja1
Supplementary Table 5 . List of particular genera obtained from Venn Euler diagram during water conditions
Sites	Total	Elements	Level	Domain	Phylum	Class	Order	Family
Site A	59	Acidomonas	genus	Bacteria	Proteobacteria	Alphaproteobacteria	Rhodospirillales	Acetobacteraceae
Site A	59	Aeromonadaceae unclassified	family	Bacteria	Proteobacteria	Gammaproteobacteria	Aeromonadales	Aeromonadaceae
Site A	59	Agrococcus	genus	Bacteria	Actinobacteria	Actinobacteria	Micrococcales	Microbacteriaceae
Site A	59	Aquincola	genus	Bacteria	Proteobacteria	Betaproteobacteria	Burkholderiales
Site A	59	Azonexus	genus	Bacteria	Proteobacteria	Betaproteobacteria	Rhodocyclales	Rhodocyclaceae
Site A	59	Blastomonas	genus	Bacteria	Proteobacteria	Alphaproteobacteria	Sphingomonadales	Sphingomonadaceae
Site A	59	Candidatus Azambacteria unclassified	phylum	Bacteria	Candidatus Azambacteria
Site A	59	Candidatus Roizmanbacteria unclassified	phylum	Bacteria	Candidatus Roizmanbacteria
Site A	59	Candidatus Woesebacteria unclassified	phylum	Bacteria	Candidatus Woesebacteria
Site A	59	Carnobacterium	genus	Bacteria	Firmicutes	Bacilli	Lactobacillales	Carnobacteriaceae
Site A	59	Chelativorans	genus	Bacteria	Proteobacteria	Alphaproteobacteria	Rhizobiales	Phyllobacteriaceae
Site A	59	Chitinimonas	genus	Bacteria	Proteobacteria	Betaproteobacteria	Burkholderiales	Burkholderiaceae
Site A	59	Chloroflexineae unclassified	suborder	Bacteria	Chloroflexi	Chloroflexia	Chloroflexales
Site A	59	Citrobacter	genus	Bacteria	Proteobacteria	Gammaproteobacteria	Enterobacteriales	Enterobacteriaceae
Site A	59	Conexibacter	genus	Bacteria	Actinobacteria	Thermoleophilia	Solirubrobacterales	Conexibacteraceae
Site A	59	Coriobacteriia unclassified	class	Bacteria	Actinobacteria	Coriobacteriia
Site A	59	Dechloromonas	genus	Bacteria	Proteobacteria	Betaproteobacteria	Rhodocyclales	Rhodocyclaceae
Site A	59	Dermatophilaceae unclassified	family	Bacteria	Actinobacteria	Actinobacteria	Micrococcales	Dermatophilaceae
Site A	59	Dyadobacter	genus	Bacteria	Bacteroidetes	Cytophagia	Cytophagales	Cytophagaceae
Site A	59	Eggerthellaceae unclassified	family	Bacteria	Actinobacteria	Coriobacteriia	Eggerthellales	Eggerthellaceae
Site A	59	Enterococcus	genus	Bacteria	Firmicutes	Bacilli	Lactobacillales	Enterococcaceae
Site A	59	Gluconobacter	genus	Bacteria	Proteobacteria	Alphaproteobacteria	Rhodospirillales	Acetobacteraceae
Site A	59	Janibacter	genus	Bacteria	Actinobacteria	Actinobacteria	Micrococcales	Intrasporangiaceae
Site A	59	Latescibacteria unclassified	phylum	Bacteria	Latescibacteria
Site A	59	Leotiomyceta unclassified	no rank	Fungi	Ascomycota
Site A	59	Limnohabitans	genus	Bacteria	Proteobacteria	Betaproteobacteria	Burkholderiales	Comamonadaceae
Site A	59	Luteimonas	genus	Bacteria	Proteobacteria	Gammaproteobacteria	Xanthomonadales	Xanthomonadaceae
Site A	59	Methylocapsa	genus	Bacteria	Proteobacteria	Alphaproteobacteria	Rhizobiales	Beijerinckiaceae
Site A	59	Methylocella	genus	Bacteria	Proteobacteria	Alphaproteobacteria	Rhizobiales	Beijerinckiaceae
Site A	59	Methylococcus	genus	Bacteria	Proteobacteria	Gammaproteobacteria	Methylococcales	Methylococcaceae
Site A	59	Methylotenera	genus	Bacteria	Proteobacteria	Betaproteobacteria	Methylophilales	Methylophilaceae
Site A	59	Microchaetaceae unclassified	family	Bacteria	Cyanobacteria		Nostocales	Microchaetaceae
Site A	59	Microcoleus	genus	Bacteria	Cyanobacteria		Oscillatoriales
Site A	59	Mycoplasma	genus	Bacteria	Tenericutes	Mollicutes	Mycoplasmatales	Mycoplasmataceae
Site A	59	Nannocystineae unclassified	suborder	Bacteria	Proteobacteria	Deltaproteobacteria	Myxococcales
Site A	59	Oscillochloris	genus	Bacteria	Chloroflexi	Chloroflexia	Chloroflexales	Oscillochloridaceae
Site A	59	Persicobacter	genus	Bacteria	Bacteroidetes	Cytophagia	Cytophagales	Flammeovirgaceae
Site A	59	Pirellula	genus	Bacteria	Planctomycetes	Planctomycetia	Planctomycetales	Planctomycetaceae
Site A	59	Plantibacter	genus	Bacteria	Actinobacteria	Actinobacteria	Micrococcales	Microbacteriaceae
Site A	59	Propionimicrobium	genus	Bacteria	Actinobacteria	Actinobacteria	Propionibacteriales	Propionibacteriaceae
Site A	59	Pseudovibrio	genus	Bacteria	Proteobacteria	Alphaproteobacteria	Rhodobacterales	Rhodobacteraceae
Site A	59	Rahnella	genus	Bacteria	Proteobacteria	Gammaproteobacteria	Enterobacteriales	Enterobacteriaceae
Site A	59	Ramlibacter	genus	Bacteria	Proteobacteria	Betaproteobacteria	Burkholderiales	Comamonadaceae
Site A	59	Rickettsia	genus	Bacteria	Proteobacteria	Alphaproteobacteria	Rickettsiales	Rickettsiaceae
Site A	59	Rubidibacter	genus	Bacteria	Cyanobacteria		Chroococcales
Site A	59	Salmonella	genus	Bacteria	Proteobacteria	Gammaproteobacteria	Enterobacteriales	Enterobacteriaceae
Site A	59	Sedimenticola	genus	Bacteria	Proteobacteria	Gammaproteobacteria
Site A	59	Sideroxydans	genus	Bacteria	Proteobacteria	Betaproteobacteria	Gallionellales	Gallionellaceae
Site A	59	Sphaerotilus	genus	Bacteria	Proteobacteria	Betaproteobacteria	Burkholderiales
Site A	59	Spiribacter	genus	Bacteria	Proteobacteria	Gammaproteobacteria	Chromatiales	Ectothiorhodospiraceae
Site A	59	Spirosoma	genus	Bacteria	Bacteroidetes	Cytophagia	Cytophagales	Cytophagaceae
Site A	59	Spirulina	genus	Bacteria	Cyanobacteria		Oscillatoriales
Site A	59	Sulfuricella	genus	Bacteria	Proteobacteria	Betaproteobacteria	Sulfuricellales	Sulfuricellaceae
Site A	59	Sutterella	genus	Bacteria	Proteobacteria	Betaproteobacteria	Burkholderiales	Sutterellaceae
Site A	59	Symbiobacterium	genus	Bacteria	Firmicutes	Clostridia	Clostridiales	Symbiobacteriaceae
Site A	59	Tepidicaulis	genus	Bacteria	Proteobacteria	Alphaproteobacteria	Rhizobiales	Rhodobiaceae
Site A	59	Thermoactinomycetaceae unclassified	family	Bacteria	Firmicutes	Bacilli	Bacillales	Thermoactinomycetaceae
Site A	59	Tolypothrix	genus	Bacteria	Cyanobacteria		Nostocales	Microchaetaceae
Site A	59	Truepera	genus	Bacteria	Deinococcus-Thermus	Deinococci	Deinococcales	Trueperaceae
Site A Site B	14	Sphaerobacter	genus	Bacteria	Chloroflexi	Thermomicrobia	Sphaerobacterales	Sphaerobacteraceae
Site A Site B	14	Unclassified Acidobacteria unclassified	no rank	Bacteria	Acidobacteria
Site A Site B	14	Xenophilus	genus	Bacteria	Proteobacteria	Betaproteobacteria	Burkholderiales	Comamonadaceae
Site A Site B	14	Cronobacter	genus	Bacteria	Proteobacteria	Gammaproteobacteria	Enterobacteriales	Enterobacteriaceae
Site A Site B	14	Nocardiopsaceae unclassified	family	Bacteria	Actinobacteria	Actinobacteria	Streptosporangiales	Nocardiopsaceae
Site A Site B	14	Oceanithermus	genus	Bacteria	Deinococcus-Thermus	Deinococci	Thermales	Thermaceae
Site A Site B	14	Candidatus Falkowbacteria unclassified	phylum	Bacteria	Candidatus Falkowbacteria
Site A Site B	14	Nocardiaceae unclassified	family	Bacteria	Actinobacteria	Actinobacteria	Corynebacteriales	Nocardiaceae
Site A Site B	14	Erwinia	genus	Bacteria	Proteobacteria	Gammaproteobacteria	Enterobacteriales	Enterobacteriaceae
Site A Site B	14	Chloroflexales unclassified	order	Bacteria	Chloroflexi	Chloroflexia	Chloroflexales
Site A Site B	14	Thermoanaerobaculum	genus	Bacteria	Acidobacteria
Site A Site B	14	Cellulosimicrobium	genus	Bacteria	Actinobacteria	Actinobacteria	Micrococcales	Promicromonosporaceae
Site A Site B	14	Thermaceae unclassified	family	Bacteria	Deinococcus-Thermus	Deinococci	Thermales	Thermaceae
Site A Site B	14	Candidatus Contendobacter	genus	Bacteria	Proteobacteria	Gammaproteobacteria		Competibacteraceae
Site A Site B Site C	2	Ornatilinea	genus	Bacteria	Chloroflexi	Anaerolineae	Anaerolineales	Anaerolineaceae
Site A Site B Site C	2	Rikenellaceae unclassified	family	Bacteria	Bacteroidetes	Bacteroidia	Bacteroidales	Rikenellaceae
Site A Site C	7	Anaerolinea	genus	Bacteria	Chloroflexi	Anaerolineae	Anaerolineales	Anaerolineaceae
Site A Site C	7	Candidatus Magasanikbacteria unclassified	phylum	Bacteria	Candidatus Magasanikbacteria
Site A Site C	7	Unclassified Myxococcales unclassified	no rank	Bacteria	Proteobacteria	Deltaproteobacteria	Myxococcales
Site A Site C	7	Nitrospira	genus	Bacteria	Nitrospirae	Nitrospira	Nitrospirales	Nitrospiraceae
Site A Site C	7	Shewanella	genus	Bacteria	Proteobacteria	Gammaproteobacteria	Alteromonadales	Shewanellaceae
Site A Site C	7	Lachnoclostridium	genus	Bacteria	Firmicutes	Clostridia	Clostridiales	Lachnospiraceae
Site A Site C	7	Candidatus Collierbacteria unclassified	phylum	Bacteria	Candidatus Collierbacteria
Site B	136	Archaea unclassified	superkingdom	Archaea
Site B	136	FCB group unclassified	no rank	Bacteria
Site B	136	Acidobacteriaceae unclassified	family	Bacteria	Acidobacteria	Acidobacteriia	Acidobacteriales	Acidobacteriaceae
Site B	136	Geothrix	genus	Bacteria	Acidobacteria	Holophagae	Holophagales	Holophagaceae
Site B	136	Holophaga	genus	Bacteria	Acidobacteria	Holophagae	Holophagales	Holophagaceae
Site B	136	Candidatus Solibacter	genus	Bacteria	Acidobacteria	Solibacteres	Solibacterales	Solibacteraceae
Site B	136	Bryobacter	genus	Bacteria	Acidobacteria	Solibacteres	Solibacterales
Site B	136	Acidimicrobiia unclassified	class	Bacteria	Actinobacteria	Acidimicrobiia
Site B	136	Actinomycetaceae unclassified	family	Bacteria	Actinobacteria	Actinobacteria	Actinomycetales	Actinomycetaceae
Site B	136	Brachybacterium	genus	Bacteria	Actinobacteria	Actinobacteria	Micrococcales	Dermabacteraceae
Site B	136	Actinomadura	genus	Bacteria	Actinobacteria	Actinobacteria	Streptosporangiales	Thermomonosporaceae
Site B	136	Brevibacterium	genus	Bacteria	Actinobacteria	Actinobacteria	Micrococcales	Brevibacteriaceae
Site B	136	Pseudonocardia	genus	Bacteria	Actinobacteria	Actinobacteria	Pseudonocardiales	Pseudonocardiaceae
Site B	136	Nonomuraea	genus	Bacteria	Actinobacteria	Actinobacteria	Streptosporangiales	Streptosporangiaceae
Site B	136	Serinicoccus	genus	Bacteria	Actinobacteria	Actinobacteria	Micrococcales	Intrasporangiaceae
Site B	136	Prauserella	genus	Bacteria	Actinobacteria	Actinobacteria	Pseudonocardiales	Pseudonocardiaceae
Site B	136	Cellulomonadaceae unclassified	family	Bacteria	Actinobacteria	Actinobacteria	Micrococcales	Cellulomonadaceae
Site B	136	Frigoribacterium	genus	Bacteria	Actinobacteria	Actinobacteria	Micrococcales	Microbacteriaceae
Site B	136	Oerskovia	genus	Bacteria	Actinobacteria	Actinobacteria	Micrococcales	Cellulomonadaceae
Site B	136	Micromonosporaceae unclassified	family	Bacteria	Actinobacteria	Actinobacteria	Micromonosporales	Micromonosporaceae
Site B	136	Williamsia	genus	Bacteria	Actinobacteria	Actinobacteria	Corynebacteriales	Williamsiaceae
Site B	136	Saccharothrix	genus	Bacteria	Actinobacteria	Actinobacteria	Pseudonocardiales	Pseudonocardiaceae
Site B	136	Collinsella	genus	Bacteria	Actinobacteria	Coriobacteriia	Coriobacteriales	Coriobacteriaceae
Site B	136	Eggerthella	genus	Bacteria	Actinobacteria	Coriobacteriia	Eggerthellales	Eggerthellaceae
Site B	136	Solirubrobacterales unclassified	order	Bacteria	Actinobacteria	Thermoleophilia	Solirubrobacterales
Site B	136	Sulfurihydrogenibium	genus	Bacteria	Aquificae	Aquificae	Aquificales	Hydrogenothermaceae
Site B	136	Sanguibacteroides	genus	Bacteria	Bacteroidetes	Bacteroidia	Bacteroidales	Porphyromonadaceae
Site B	136	Prevotellaceae unclassified	family	Bacteria	Bacteroidetes	Bacteroidia	Bacteroidales	Prevotellaceae
Site B	136	Parabacteroides	genus	Bacteria	Bacteroidetes	Bacteroidia	Bacteroidales	Porphyromonadaceae
Site B	136	Hymenobacter	genus	Bacteria	Bacteroidetes	Cytophagia	Cytophagales	Cytophagaceae
Site B	136	Candidate division Zixibacteria unclassified	phylum	Bacteria	Candidate division Zixibacteria
Site B	136	Candidatus Hydrogenedentes unclassified	phylum	Bacteria	Candidatus Hydrogenedentes
Site B	136	Candidatus Kaiserbacteria unclassified	phylum	Bacteria	Candidatus Kaiserbacteria
Site B	136	Candidatus Pacebacteria unclassified	phylum	Bacteria	Candidatus Pacebacteria
Site B	136	Candidatus Rokubacteria unclassified	phylum	Bacteria	Candidatus Rokubacteria
Site B	136	Candidatus Wolfebacteria unclassified	phylum	Bacteria	Candidatus Wolfebacteria
Site B	136	Chlorobaculum	genus	Bacteria	Chlorobi	Chlorobia	Chlorobiales	Chlorobiaceae
Site B	136	Chloroflexi unclassified	phylum	Bacteria	Chloroflexi
Site B	136	Anaerolineaceae unclassified	family	Bacteria	Chloroflexi	Anaerolineae	Anaerolineales	Anaerolineaceae
Site B	136	Anaerolineae unclassified	class	Bacteria	Chloroflexi	Anaerolineae
Site B	136	Levilinea	genus	Bacteria	Chloroflexi	Anaerolineae	Anaerolineales	Anaerolineaceae
Site B	136	Roseiflexus	genus	Bacteria	Chloroflexi	Chloroflexia	Chloroflexales	Roseiflexaceae
Site B	136	Dehalogenimonas	genus	Bacteria	Chloroflexi	Dehalococcoidia
Site B	136	Dehalococcoidia unclassified	class	Bacteria	Chloroflexi	Dehalococcoidia
Site B	136	Chrysosporum	genus	Bacteria	Cyanobacteria		Nostocales	Nostocaceae
Site B	136	Kamptonema	genus	Bacteria	Cyanobacteria		Oscillatoriales
Site B	136	Cyanobium	genus	Bacteria	Cyanobacteria		Chroococcales
Site B	136	Fischerella	genus	Bacteria	Cyanobacteria		Stigonematales
Site B	136	Nostocales unclassified	order	Bacteria	Cyanobacteria		Nostocales
Site B	136	Deinococci unclassified	class	Bacteria	Deinococcus-Thermus	Deinococci
Site B	136	Thermus	genus	Bacteria	Deinococcus-Thermus	Deinococci	Thermales	Thermaceae
Site B	136	Halomicrobium	genus	Archaea	Euryarchaeota	Halobacteria	Halobacteriales	Halobacteriaceae
Site B	136	Haloferacaceae unclassified	family	Archaea	Euryarchaeota	Halobacteria	Haloferacales	Haloferacaceae
Site B	136	Methanoculleus	genus	Archaea	Euryarchaeota	Methanomicrobia	Methanomicrobiales	Methanomicrobiaceae
Site B	136	Methanosarcinaceae unclassified	family	Archaea	Euryarchaeota	Methanomicrobia	Methanosarcinales	Methanosarcinaceae
Site B	136	Methanosarcina	genus	Archaea	Euryarchaeota	Methanomicrobia	Methanosarcinales	Methanosarcinaceae
Site B	136	Thermoplasmatales unclassified	order	Archaea	Euryarchaeota	Thermoplasmata	Thermoplasmatales
Site B	136	Paenibacillaceae unclassified	family	Bacteria	Firmicutes	Bacilli	Bacillales	Paenibacillaceae
Site B	136	Brevibacillus	genus	Bacteria	Firmicutes	Bacilli	Bacillales	Paenibacillaceae
Site B	136	Alicyclobacillus	genus	Bacteria	Firmicutes	Bacilli	Bacillales	Alicyclobacillaceae
Site B	136	Thermaerobacter	genus	Bacteria	Firmicutes	Clostridia	Clostridiales	Clostridiales Family XVII. Incertae Sedis
Site B	136	Ruminiclostridium	genus	Bacteria	Firmicutes	Clostridia	Clostridiales	Ruminococcaceae
Site B	136	Ruminococcaceae unclassified	family	Bacteria	Firmicutes	Clostridia	Clostridiales	Ruminococcaceae
Site B	136	Limnochorda	genus	Bacteria	Firmicutes	Limnochordia	Limnochordales	Limnochordaceae
Site B	136	Selenomonas	genus	Bacteria	Firmicutes	Negativicutes	Selenomonadales	Veillonellaceae
Site B	136	Veillonellaceae unclassified	family	Bacteria	Firmicutes	Negativicutes	Selenomonadales	Veillonellaceae
Site B	136	Gemmatirosa	genus	Bacteria	Gemmatimonadetes	Gemmatimonadetes	Gemmatimonadales	Gemmatimonadaceae
Site B	136	Gemmatimonas	genus	Bacteria	Gemmatimonadetes	Gemmatimonadetes	Gemmatimonadales	Gemmatimonadaceae
Site B	136	Nitrospirae unclassified	phylum	Bacteria	Nitrospirae
Site B	136	Leptospirillum	genus	Bacteria	Nitrospirae	Nitrospira	Nitrospirales	Nitrospiraceae
Site B	136	Phycisphaerae unclassified	class	Bacteria	Planctomycetes	Phycisphaerae
Site B	136	Singulisphaera	genus	Bacteria	Planctomycetes	Planctomycetia	Planctomycetales	Isosphaeraceae
Site B	136	Gemmata	genus	Bacteria	Planctomycetes	Planctomycetia	Planctomycetales	Planctomycetaceae
Site B	136	Isosphaera	genus	Bacteria	Planctomycetes	Planctomycetia	Planctomycetales	Isosphaeraceae
Site B	136	Planctomycetaceae unclassified	family	Bacteria	Planctomycetes	Planctomycetia	Planctomycetales	Planctomycetaceae
Site B	136	Planctomycetales unclassified	order	Bacteria	Planctomycetes	Planctomycetia	Planctomycetales
Site B	136	Isosphaeraceae unclassified	family	Bacteria	Planctomycetes	Planctomycetia	Planctomycetales	Isosphaeraceae
Site B	136	Delta/epsilon subdivisions unclassified	subphylum	Bacteria	Proteobacteria
Site B	136	Komagataeibacter	genus	Bacteria	Proteobacteria	Alphaproteobacteria	Rhodospirillales	Acetobacteraceae
Site B	136	Hyphomonadaceae unclassified	family	Bacteria	Proteobacteria	Alphaproteobacteria	Rhodobacterales	Hyphomonadaceae
Site B	136	Acetobacter	genus	Bacteria	Proteobacteria	Alphaproteobacteria	Rhodospirillales	Acetobacteraceae
Site B	136	Beijerinckiaceae unclassified	family	Bacteria	Proteobacteria	Alphaproteobacteria	Rhizobiales	Beijerinckiaceae
Site B	136	Novispirillum	genus	Bacteria	Proteobacteria	Alphaproteobacteria	Rhodospirillales	Rhodospirillaceae
Site B	136	Thalassobius	genus	Bacteria	Proteobacteria	Alphaproteobacteria	Rhodobacterales	Rhodobacteraceae
Site B	136	Rhodomicrobium	genus	Bacteria	Proteobacteria	Alphaproteobacteria	Rhizobiales	Hyphomicrobiaceae
Site B	136	Phaeospirillum	genus	Bacteria	Proteobacteria	Alphaproteobacteria	Rhodospirillales	Rhodospirillaceae
Site B	136	Ralstonia	genus	Bacteria	Proteobacteria	Betaproteobacteria	Burkholderiales	Burkholderiaceae
Site B	136	Pseudogulbenkiania	genus	Bacteria	Proteobacteria	Betaproteobacteria	Neisseriales	Chromobacteriaceae
Site B	136	Derxia	genus	Bacteria	Proteobacteria	Betaproteobacteria	Burkholderiales	Alcaligenaceae
Site B	136	Thiobacillus	genus	Bacteria	Proteobacteria	Betaproteobacteria	Hydrogenophilales	Hydrogenophilaceae
Site B	136	Methylophilus	genus	Bacteria	Proteobacteria	Betaproteobacteria	Methylophilales	Methylophilaceae
Site B	136	Alicycliphilus	genus	Bacteria	Proteobacteria	Betaproteobacteria	Burkholderiales	Comamonadaceae
Site B	136	Alcaligenes	genus	Bacteria	Proteobacteria	Betaproteobacteria	Burkholderiales	Alcaligenaceae
Site B	136	Azoarcus	genus	Bacteria	Proteobacteria	Betaproteobacteria	Rhodocyclales	Rhodocyclaceae
Site B	136	Hydrogenophaga	genus	Bacteria	Proteobacteria	Betaproteobacteria	Burkholderiales	Comamonadaceae
Site B	136	Delftia	genus	Bacteria	Proteobacteria	Betaproteobacteria	Burkholderiales	Comamonadaceae
Site B	136	Pseudorhodoferax	genus	Bacteria	Proteobacteria	Betaproteobacteria	Burkholderiales	Comamonadaceae
Site B	136	Polaromonas	genus	Bacteria	Proteobacteria	Betaproteobacteria	Burkholderiales	Comamonadaceae
Site B	136	Curvibacter	genus	Bacteria	Proteobacteria	Betaproteobacteria	Burkholderiales	Comamonadaceae
Site B	136	Leptothrix	genus	Bacteria	Proteobacteria	Betaproteobacteria	Burkholderiales
Site B	136	Pandoraea	genus	Bacteria	Proteobacteria	Betaproteobacteria	Burkholderiales	Burkholderiaceae
Site B	136	Desulfobacca	genus	Bacteria	Proteobacteria	Deltaproteobacteria	Syntrophobacterales	Syntrophaceae
Site B	136	Labilithrix	genus	Bacteria	Proteobacteria	Deltaproteobacteria	Myxococcales	Labilitrichaceae
Site B	136	Desulfonauticus	genus	Bacteria	Proteobacteria	Deltaproteobacteria	Desulfovibrionales	Desulfohalobiaceae
Site B	136	Desulfofustis	genus	Bacteria	Proteobacteria	Deltaproteobacteria	Desulfobacterales	Desulfobulbaceae
Site B	136	Desulfarculaceae unclassified	family	Bacteria	Proteobacteria	Deltaproteobacteria	Desulfarculales	Desulfarculaceae
Site B	136	Sandaracinus	genus	Bacteria	Proteobacteria	Deltaproteobacteria	Myxococcales	Sandaracinaceae
Site B	136	Corallococcus	genus	Bacteria	Proteobacteria	Deltaproteobacteria	Myxococcales	Myxococcaceae
Site B	136	Cystobacter	genus	Bacteria	Proteobacteria	Deltaproteobacteria	Myxococcales	Cystobacteraceae
Site B	136	Stigmatella	genus	Bacteria	Proteobacteria	Deltaproteobacteria	Myxococcales	Cystobacteraceae
Site B	136	Syntrophaceae unclassified	family	Bacteria	Proteobacteria	Deltaproteobacteria	Syntrophobacterales	Syntrophaceae
Site B	136	Plesiocystis	genus	Bacteria	Proteobacteria	Deltaproteobacteria	Myxococcales	Nannocystaceae
Site B	136	Sorangium	genus	Bacteria	Proteobacteria	Deltaproteobacteria	Myxococcales	Polyangiaceae
Site B	136	Haliangium	genus	Bacteria	Proteobacteria	Deltaproteobacteria	Myxococcales	Kofleriaceae
Site B	136	Sorangiineae unclassified	suborder	Bacteria	Proteobacteria	Deltaproteobacteria	Myxococcales
Site B	136	Vulgatibacter	genus	Bacteria	Proteobacteria	Deltaproteobacteria	Myxococcales	Vulgatibacteraceae
Site B	136	Syntrophus	genus	Bacteria	Proteobacteria	Deltaproteobacteria	Syntrophobacterales	Syntrophaceae
Site B	136	Syntrophobacter	genus	Bacteria	Proteobacteria	Deltaproteobacteria	Syntrophobacterales	Syntrophobacteraceae
Site B	136	Chondromyces	genus	Bacteria	Proteobacteria	Deltaproteobacteria	Myxococcales	Polyangiaceae
Site B	136	Desulfobulbaceae unclassified	family	Bacteria	Proteobacteria	Deltaproteobacteria	Desulfobacterales	Desulfobulbaceae
Site B	136	Enhygromyxa	genus	Bacteria	Proteobacteria	Deltaproteobacteria	Myxococcales
Site B	136	Desulfurivibrio	genus	Bacteria	Proteobacteria	Deltaproteobacteria	Desulfobacterales	Desulfobulbaceae
Site B	136	Syntrophorhabdus	genus	Bacteria	Proteobacteria	Deltaproteobacteria	Syntrophobacterales	Syntrophorhabdaceae
Site B	136	Morganella	genus	Bacteria	Proteobacteria	Gammaproteobacteria	Enterobacteriales	Enterobacteriaceae
Site B	136	Wenzhouxiangella	genus	Bacteria	Proteobacteria	Gammaproteobacteria	Chromatiales	Wenzhouxiangellaceae
Site B	136	Edwardsiella	genus	Bacteria	Proteobacteria	Gammaproteobacteria	Enterobacteriales	Enterobacteriaceae
Site B	136	Sinobacteraceae unclassified	family	Bacteria	Proteobacteria	Gammaproteobacteria	Nevskiales	Sinobacteraceae
Site B	136	Mizugakiibacter	genus	Bacteria	Proteobacteria	Gammaproteobacteria	Xanthomonadales	Rhodanobacteraceae
Site B	136	Methylobacter	genus	Bacteria	Proteobacteria	Gammaproteobacteria	Methylococcales	Methylococcaceae
Site B	136	Azotobacter	genus	Bacteria	Proteobacteria	Gammaproteobacteria	Pseudomonadales	Pseudomonadaceae
Site B	136	Sphaerochaeta	genus	Bacteria	Spirochaetes	Spirochaetia	Spirochaetales	Spirochaetaceae
Site B	136	Synergistaceae unclassified	family	Bacteria	Synergistetes	Synergistia	Synergistales	Synergistaceae
Site B	136	Mesotoga	genus	Bacteria	Thermotogae	Thermotogae	Kosmotogales	Kosmotogaceae
Site B	136	Opitutus	genus	Bacteria	Verrucomicrobia	Opitutae	Opitutales	Opitutaceae
Site B	136	Haloferula	genus	Bacteria	Verrucomicrobia	Verrucomicrobiae	Verrucomicrobiales	Verrucomicrobiaceae
Site B	136	Verrucomicrobium	genus	Bacteria	Verrucomicrobia	Verrucomicrobiae	Verrucomicrobiales	Verrucomicrobiaceae
Site B Site C	6	Streptosporangiaceae unclassified	family	Bacteria	Actinobacteria	Actinobacteria	Streptosporangiales	Streptosporangiaceae
Site B Site C	6	Zavarzinella	genus	Bacteria	Planctomycetes	Planctomycetia	Planctomycetales	Planctomycetaceae
Site B Site C	6	Candidatus Gottesmanbacteria unclassified	phylum	Bacteria	Candidatus Gottesmanbacteria
Site B Site C	6	Blastopirellula	genus	Bacteria	Planctomycetes	Planctomycetia	Planctomycetales	Planctomycetaceae
Site B Site C	6	Caldilinea	genus	Bacteria	Chloroflexi	Caldilineae	Caldilineales	Caldilineaceae
Site B Site C	6	Brachyspira	genus	Bacteria	Spirochaetes	Spirochaetia	Brachyspirales	Brachyspiraceae
Site C	36	Pseudonocardiaceae unclassified	family	Bacteria	Actinobacteria	Actinobacteria	Pseudonocardiales	Pseudonocardiaceae
Site C	36	Slackia	genus	Bacteria	Actinobacteria	Coriobacteriia	Eggerthellales	Eggerthellaceae
Site C	36	Patulibacter	genus	Bacteria	Actinobacteria	Thermoleophilia	Solirubrobacterales	Patulibacteraceae
Site C	36	Candidate division NC10 unclassified	phylum	Bacteria	Candidate division NC10
Site C	36	Candidatus Amesbacteria unclassified	phylum	Bacteria	Candidatus Amesbacteria
Site C	36	Candidatus Aminicenantes unclassified	phylum	Bacteria	Candidatus Aminicenantes
Site C	36	Candidatus Shapirobacteria unclassified	phylum	Bacteria	Candidatus Shapirobacteria
Site C	36	Simkania	genus	Bacteria	Chlamydiae	Chlamydiia	Chlamydiales	Simkaniaceae
Site C	36	Bellilinea	genus	Bacteria	Chloroflexi	Anaerolineae	Anaerolineales	Anaerolineaceae
Site C	36	Longilinea	genus	Bacteria	Chloroflexi	Anaerolineae	Anaerolineales	Anaerolineaceae
Site C	36	Ardenticatena	genus	Bacteria	Chloroflexi	Ardenticatenia	Ardenticatenales	Ardenticatenaceae
Site C	36	Dehalococcoides	genus	Bacteria	Chloroflexi	Dehalococcoidia	Dehalococcoidales	Dehalococcoidaceae
Site C	36	Thermomicrobia unclassified	class	Bacteria	Chloroflexi	Thermomicrobia
Site C	36	Halobacterium	genus	Archaea	Euryarchaeota	Halobacteria	Halobacteriales	Halobacteriaceae
Site C	36	Haloferax	genus	Archaea	Euryarchaeota	Halobacteria	Haloferacales	Haloferacaceae
Site C	36	Methanobacterium	genus	Archaea	Euryarchaeota	Methanobacteria	Methanobacteriales	Methanobacteriaceae
Site C	36	Thermococcaceae unclassified	family	Archaea	Euryarchaeota	Thermococci	Thermococcales	Thermococcaceae
Site C	36	Thermococcus	genus	Archaea	Euryarchaeota	Thermococci	Thermococcales	Thermococcaceae
Site C	36	Fibrobacteria unclassified	class	Bacteria	Fibrobacteres	Fibrobacteria
Site C	36	Anoxybacillus	genus	Bacteria	Firmicutes	Bacilli	Bacillales	Bacillaceae
Site C	36	Oscillospiraceae unclassified	family	Bacteria	Firmicutes	Clostridia	Clostridiales	Oscillospiraceae
Site C	36	Peptostreptococcaceae unclassified	family	Bacteria	Firmicutes	Clostridia	Clostridiales	Peptostreptococcaceae
Site C	36	Cetobacterium	genus	Bacteria	Fusobacteria	Fusobacteriia	Fusobacteriales	Fusobacteriaceae
Site C	36	Candidatus Omnitrophus	genus	Bacteria	Omnitrophica
Site C	36	Rubinisphaera	genus	Bacteria	Planctomycetes	Planctomycetia	Planctomycetales	Planctomycetaceae
Site C	36	Candidatus Brocadiaceae unclassified	family	Bacteria	Planctomycetes	Planctomycetia	Candidatus Brocadiales	Candidatus Brocadiaceae
Site C	36	Neisseriales unclassified	order	Bacteria	Proteobacteria	Betaproteobacteria	Neisseriales
Site C	36	Polyangiaceae unclassified	family	Bacteria	Proteobacteria	Deltaproteobacteria	Myxococcales	Polyangiaceae
Site C	36	Desulfomonile	genus	Bacteria	Proteobacteria	Deltaproteobacteria	Syntrophobacterales	Syntrophaceae
Site C	36	Desulfohalobiaceae unclassified	family	Bacteria	Proteobacteria	Deltaproteobacteria	Desulfovibrionales	Desulfohalobiaceae
Site C	36	Archangium	genus	Bacteria	Proteobacteria	Deltaproteobacteria	Myxococcales	Cystobacteraceae
Site C	36	Rheinheimera	genus	Bacteria	Proteobacteria	Gammaproteobacteria	Chromatiales	Chromatiaceae
Site C	36	Thermanaerovibrio	genus	Bacteria	Synergistetes	Synergistia	Synergistales	Synergistaceae
Site C	36	Jonquetella	genus	Bacteria	Synergistetes	Synergistia	Synergistales	Synergistaceae
Site C	36	Thermotoga	genus	Bacteria	Thermotogae	Thermotogae	Thermotogales	Thermotogaceae
Site C	36	Pedosphaera	genus	Bacteria	Verrucomicrobia	Verrucomicrobiae	Verrucomicrobiales	Verrucomicrobia subdivision 3
